# Supplementary material for: Efficient removal of chromate ions from aqueous solution using a highly cost-effective ferric coordinated [3-(2-aminoethylamino)propyl]trimethoxysilane–MCM-41 adsorbent
Source: Royal Society of Chemistry journal article supplement (doi:10.1039/d0ra07425j), 2021-01-01
Supplement: d0ra07425j1.pdf [file d0ra07425j1.pdf]

## Efficient removal of chromate ion from aqueous solution using highly cost-effective Ferric coordinated [3-Aminoethylamino) propyl] trimethoxysilane-MCM-41 adsorbent

Rakesh Kumar Madri<sup>a</sup>, Dhanesh Tiwari<sup>\*,a</sup>, Indrajit Sinha<sup>a</sup>

<sup>a</sup> Department of chemistry, Indian Institute of Technology, Banaras Hindu University, Varanasi-221005, India

\*Corresponding author: Ph.no. +91-9415992174; E-mail: dtiwari.apc@iitbhu.ac.in.

### Supplementary addition

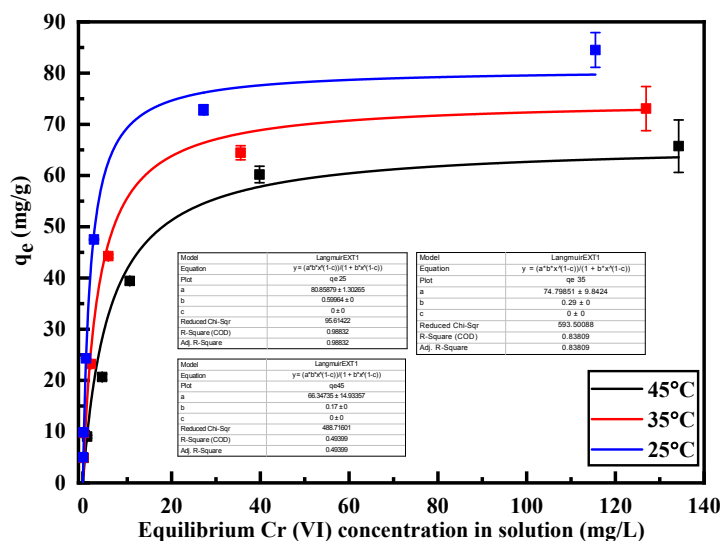

Fig1. Showing Non-Linear Langmuir Fit.

| Non-linear Langmuir Isotherm |       |      |                |                |
|------------------------------|-------|------|----------------|----------------|
| Temperature                  | qm    | b    | R <sup>2</sup> | R <sub>L</sub> |
| 25°C                         | 80.85 | 0.59 | 0.98           | 0.03           |
| 35°C                         | 74.79 | 0.29 | 0.83           | 0.06           |
| 45°C                         | 66.34 | 0.17 | 0.49           | 0.1            |
